# Supplementary material
Source: PubMed Central journal article supplement (PMC4250357)
Supplement: NIHMS635343-supplement-2.pdf [file NIHMS635343-supplement-2.pdf]

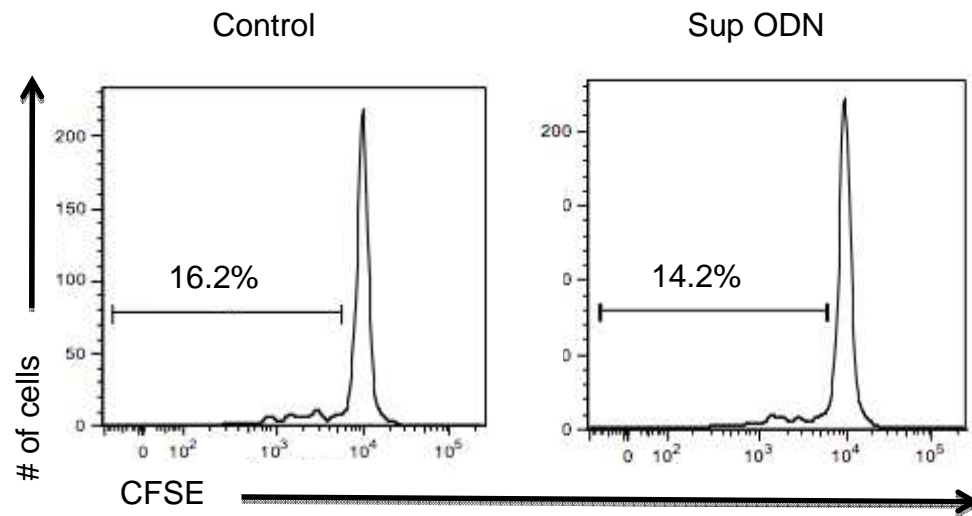

Supplemental Figure 1: Effect of Sup ODN on the proliferation of CD4+CD25+Foxp3+ cells.

CD4+CD25+ T cells were isolated from female BALB/c mice by MACS. Cells were labeled with CFSE and incubated for 2 h with 1  $\mu$ M of Sup ODN and then cultured with anti-CD3/anti-CD28 Abs plus IL-2. The proliferation of CD4+CD25+Foxp3+ cells was determined by CFSE dilution on a flow cytometer on day 7.
